# Supplementary material for: Amyloid-β Induces Cdh1-Mediated Rock2 Stabilization Causing Neurodegeneration
Source: Front Pharmacol. 2022 Apr 14;13:884470. doi: 10.3389/fphar.2022.884470 (PMC9047900; doi:10.3389/fphar.2022.884470)
Supplement: Supplementary file 3 [file Table1.XLSX]

## Sheet: Fig 1
Figure 1
	1A	Cdh1 protein levels; fold
		Aβ treatment (hours)
		0	4	8	16	24
	Cultive 1	1	1.34	1.43	1.23	1.12
	Cultive 2	1	1.31	1.41	1.36	0.91
	Cultive 3	1	1.13	1.1	1	0.93
	Cultive 4	1	0.98	1.2	0.86	0.83
	mean	1	1.19	1.285	1.1125	0.9475
	sem	0	0.0839643	0.0806742	0.112352	0.0614241
	1B	Cdh1 mean fluorescence; fold
		Total			Cytosol			Nucleus
		Control	Aβ	Aβ+Rosc	Control	Aβ	Aβ+Rosc	Control	Aβ	Aβ+Rosc
	Cultive 1	1	1.15	0.96	1	1.15	0.94	1	1.12	0.96
	Cultive 2	1	1.05	1.01	1	1.08	1.02	1	0.96	0.96
	Cultive 3	1	1.11	0.98	1	1.09	1	1	1.12	0.97
	mean	1	1.10333	0.983333	1	1.10667	0.986667	1	1.06667	0.963333
	sem	0	0.0290593	0.0145297	0	0.0218581	0.024037	0	0.0533333	0.00333333
	1F	APC/C activity; AU/hour
		Control	Aβ	Aβ+Rosc	Aβ+siCdk5
	Cultive 1	123.4	55.8	114	90.3
	Cultive 2	107.7	52.2	101.2	101.2
	Cultive 3	118.56	60.07	118.62	94.41
	mean	116.553	56.0233	111.273	95.3033
	sem	4.64193	2.27462	5.21025	3.1781

## Sheet: Fig 2
Figure 2
	2A	Caspase-3 Activity; pmol AMC/h/µg protein
		Control	Aβ	Aβ+Rosc
	Cultive 1	7.89	28.46	19.49
	Cultive 2	9.71	31.72	25.1
	Cultive 3	13.3	33.92	22.65
	Cultive 4	8.04	32.73	24.04
	mean	9.735	31.7075	22.82
	sem	1.25787	1.17214	1.21808
	2B	Apoptosis; AnnexinV+/7AAD- (%)
		Empty		Cdh1-A		Cdh1-D
		Control	Aβ	Control	Aβ	Control	Aβ
	Cultive 1	10.93	25.5	10.4	16.7	23.5	38.7
	Cultive 2	11.05	27.8	11.7	18.4	21.9	36.4
	Cultive 3	11.99	26.5	9.5	17.7	24.4	39.2
	Cultive 4	13.01	28.3	10.5	19.5	22	37.1
	mean	11.745	27.025	10.525	18.075	22.95	37.85
	sem	0.483692	0.634265	0.451617	0.589315	0.606218	0.658913
	2C	Apoptosis; AnnexinV+/7AAD- (%)
		siControl		siCdh1		proTAME
		Control	Aβ	Control	Aβ	Control	Aβ
	Cultive 1	11.7	26.3	17.8	33.6	18.9	35.5
	Cultive 2	13.5	28.8	18.5	35.8	21.2	37.7
	Cultive 3	12.9	27.8	17.8	36.8	20.4	36.3
	Cultive 4	11.2	25.5	19.3	35.5	21.3	34.7
	mean	12.325	27.1	18.35	35.425	20.45	36.05
	sem	0.529741	0.740495	0.357071	0.668799	0.554527	0.639661
	2C	Caspase-3 Activity; pmol AMC/h/µg protein
		siControl		siCdh1		proTAME
		Control	Aβ	Control	Aβ	Control	Aβ
	Cultive 1	9.67	26.38	10.91	36.73	12.38	36.13
	Cultive 2	13.54	26.4	21.91	40.71	14.54	42.04
	Cultive 3	7.59	26.82	14.76	35.2	17.24	41.89
	Cultive 4	6.67	30.7	10.3	52.79	12.07	54.54
	mean	9.3675	27.575	14.47	41.3575	14.0575	43.65
	sem	1.52581	1.04659	2.66927	3.98382	1.19462	3.88193

## Sheet: Fig 3
Figure 3
	3A	Rock2 protein levels; fold
		Aβ treatment (hours)
		0	4	8	16	24
	Cultive 1	1	1.25	1.56	1.31	1.56
	Cultive 2	1	1.35	1.4	1.33	1.49
	Cultive 3	1	1.29	1.32	1.3	1.39
	Cultive 4	1	1.24	1.31	1.29	1.21
	mean	1	1.2825	1.3975	1.3075	1.4125
	sem	0	0.0249583	0.0577891	0.00853913	0.0759797
	3C	Rock2 protein levels; fold
		Aβ treatment (hours)			proTAME +Aβ treatment (hours)
		0	8	24	0	8	24
	Cultive 1	1	1.49623	1.35631	1.30453	1.48244	1.53796
	Cultive 2	1	1.23364	1.29291	1.26359	1.24132	1.2529
	Cultive 3	1	1.71654	1.61789	1.8871	1.83013	1.7656
	Cultive 4	1	1.45414	1.24637	1.58995	1.60204	1.60935
	mean	1	1.47514	1.37837	1.51129	1.53898	1.54145
	sem	0	0.0989446	0.082959	0.144778	0.12266	0.107286
	3C	Cdh1 protein levels; fold
		Aβ treatment (hours)			proTAME +Aβ treatment (hours)
		0	8	24	0	8	24
	Cultive 1	1	1.24988	0.932152	1.16151	1.26764	0.958512
	Cultive 2	1	1.52363	1.35152	1.94496	1.95715	1.51359
	Cultive 3	1	1.45325	1.34585	1.74002	1.55653	1.58477
	Cultive 4	1	1.35461	1.26136	1.89818	1.86647	1.65154
	mean	1	1.39534	1.22272	1.68617	1.66195	1.4271
	sem	0	0.059602	0.0990254	0.180299	0.15694	0.158716
	3D	pMBS protein levels; fold
		Aβ treatment (hours)			proTAME +Aβ treatment (hours)
		0	8	24	0	8	24
	Cultive 1	1	1.34674	1.19409	1.28763	1.27181	1.05638
	Cultive 2	1	1.42086	1.38588	1.83237	1.91726	1.84444
	Cultive 3	1	1.45414	1.32992	1.58995	1.60204	1.69507
	Cultive 4	1	1.56034	1.46305	1.76174	1.82556	1.50392
	mean	1	1.44552	1.34323	1.61792	1.65417	1.52495
	sem	0	0.0443693	0.0567118	0.121294	0.143616	0.17103
	3C	pMBS/MBS protein levels; fold
		Aβ treatment (hours)			proTAME +Aβ treatment (hours)
		0	8	24	0	8	24
	Cultive 1	1	1.2422	1.28126	1.31217	1.21793	1.0052
	Cultive 2	1	1.30302	1.26965	1.95481	1.9029	1.89386
	Cultive 3	1	1.30483	1.14797	1.25812	1.26591	1.33567
	Cultive 4	1	1.37446	1.21984	1.50931	1.5526	1.34215
	mean	1	1.30613	1.22968	1.5086	1.48484	1.39422
	sem	0	0.027029	0.0303194	0.158228	0.157728	0.184191

## Sheet: Fig 4
Figure 4
	4A	Apoptosis; AnnexinV+/7AAD- (%)
		siControl			siCdh1
		Control	Aβ	Aβ+Fasudil	Control	Aβ	Aβ+Fasudil
	Cultive 1	11.21	24.07	18.63	20.15	36.48	19.18
	Cultive 2	11.41	26.81	17.4	20.32	33.08	18.03
	Cultive 3	12.86	26.39	17.59	23.2	36.1	22.35
	mean	11.8267	25.7567	17.8733	21.2233	35.22	19.8533
	sem	0.519882	0.852004	0.382288	0.989551	1.07561	1.29172
	4B	Apoptosis; AnnexinV+/7AAD- (%)
		siControl			siCdh1
		Control	Aβ	Aβ+SR3677	Control	Aβ	Aβ+SR3677
	Cultive 1	10.2	26.79	17.55	21.19	35.01	17.7
	Cultive 2	9.17	23.26	17.33	19.3	36.68	17.46
	Cultive 3	13.78	28.22	21.38	20.05	33.64	18.57
	mean	11.05	26.09	18.7533	20.18	35.11	17.91
	sem	1.39701	1.47399	1.31487	0.549454	0.878996	0.337194
	4C	Apoptosis; AnnexinV+/7AAD- (%)
		siControl			siRock2
		Control	Aβ		Control	Aβ	Aβ+proTAME
	Cultive 1	12.53	23.19		9.82	16.39	18.44
	Cultive 2	12.61	25.33		9.83	16.73	18.37
	Cultive 3	16.12	24.52		11.13	17.97	17.58
	mean	13.7533	24.3467		10.26	17.03	18.13
	sem	1.18356	0.623814		0.43501	0.480139	0.275741
	4D	Caspase-3 Activity; pmol AMC/h/µg protein
		siControl			siRock2
		Control	Aβ		Control	Aβ	proTAME	Aβ+proTAME
	Cultive 1	7.59	26.82		12.39	13.35	18.76	24.34
	Cultive 2	6.67	30.7		6.9	16	7.68	15.42
	Cultive 3	10.08	22.45		11.73	17.52	18.83	19.16
	mean	8.11333	26.6567		10.34	15.6233	15.09	19.64
	sem	1.01857	2.38297		1.73052	1.21842	3.70506	2.58614

## Sheet: Fig 5
Figure 5
	5A	Cdh1
		Protein levels (fold versus Control)
		1 day after icv		3 day after icv		5 day after icv
		Control	Aβ	Control	Aβ	Control	Aβ
	Animal 1	1	1.49	1	1.38	1	0.56
	Animal 2	1	1.33	1	0.9	1	0.71
	Animal 3	1	1.13	1	0.78	1	0.67
	mean	1	1.31667	1	1.02	1	0.646667
	sem	0	0.104137	0	0.183303	0	0.0448454
		ROCK2
		Protein levels (fold versus Control)
		1 day after icv		3 day after icv		5 day after icv
		Control	Aβ	Control	Aβ	Control	Aβ
	Animal 1	1	1.255	1	0.963	1	0.993
	Animal 2	1	1.248	1	0.94	1	0.982
	Animal 3	1	1.172	1	1.018	1	0.956
	mean	1	1.225	1	0.973667	1	0.977
	sem	0	0.0265769	0	0.0231397	0	0.0109697
	5B	pMBS
		Protein levels (fold versus Control)
		1 day after icv		5 day after icv
		Control	Aβ	Control	Aβ
	Animal 1	1	1.93	1	1.35
	Animal 2	1	1.259	1	1.35
	Animal 3	1	1.695	1	1.28
	mean	1	1.628	1	1.32667
	sem	0	0.196577	0	0.0233333
		pMBS/MBS
		Protein levels (fold versus Control)
		1 day after icv		5 day after icv
		Control	Aβ	Control	Aβ
	Animal 1	1	1.457	1	1.14
	Animal 2	1	1.911	1	1.46
	Animal 3	1	1.566	1	1.43
	mean	1	1.64467	1	1.34333
	sem	0	0.136834	0	0.102035

## Sheet: Fig 6
Figure 6
	6A	Novel Object Recognition
		Novel Object Explorations (%)				Discrimination Index
		Control	Aβ	Aβ+SR3677		Control	Aβ	Aβ+SR3677
	Animal 1	61.36	45.45	55.56		0.36	-0.02	0.53
	Animal 2	51.92	65.22	60		-0.02	0.24	0.17
	Animal 3	48.48	50	58.7		0.43	0.12	0.23
	Animal 4	75.61	50.94	52.78		0.37	0.28	0.14
	Animal 5	69.09	54.55	68.57		0.47	-0.17	0.6
	Animal 6	55.56	45	58.06		0.22	0.02	0.21
	Animal 7	67.74	35.71	56.45		0.59	-0.09	0.28
	mean	61.3943	49.5529	58.5886		0.345714	0.0542857	0.308571
	sem	3.75487	3.45633	1.88603		0.0744138	0.0631648	0.0687102
	6B	Barnes Maze; Time in escape quadrant (%)
		Before icv injection				5 days after icv injection				Delta
		Control	Aβ	Aβ+SR3677		Control	Aβ	Aβ+SR3677		Control	Aβ	Aβ+SR3677
	Animal 1	55.4	50.5	69		63.1	48	63.67		7.7	-2.5	-5.33
	Animal 2	59.6	55.87	29.57		69.53	51.03	47.63		9.93	-4.83	18.07
	Animal 3	57.93	38.07	58.63		59.83	46.33	67.3		1.9	8.27	8.67
	Animal 4	45.67	63.43	47.1		64.9	41.93	39.03		19.23	-21.5	-8.07
	Animal 5	43.2	38.9	46.47		48.23	35.63	41.2		5.03	-3.27	-5.27
	Animal 6	62.73	75	50.37		58.23	52.4	44.5		-4.5	-22.6	-5.87
	Animal 7	51.8	27.83	44.67		52.9	31.43	42.47		1.1	3.6	-2.2
	mean	53.7614	49.9429	49.4014		59.5314	43.8214	49.4		5.77	-6.11857	0
	sem	2.74056	6.16652	4.62851		2.73865	2.98222	4.29282		2.86609	4.45233	3.65897
	6C	Open Field
		Time spent in centre (sec)				Distance in centre (m)				Entries in centre (number)
		Control	Aβ	Aβ+SR3677		Control	Aβ	Aβ+SR3677		Control	Aβ	Aβ+SR3677
	Animal 1	8.9	11.9	17.7		1.717	2.401	2.043		18	19	15
	Animal 2	29.6	13.8	25.1		4.284	0.798	3.654		34	11	36
	Animal 3	36.5	17.9	11.7		1.454	2.58	4.049		35	25	11
	Animal 4	26.2	42.8	26		3.434	4.003	3.981		34	30	25
	Animal 5	12.8	21.6	29.8		4.175	2.968	1.496		16	24	34
	Animal 6	10.9	29.7	26.7		3.162	4.529	1.94		18	36	29
	Animal 7	37.9	11.8	31.8		4.345	2.151	4.734		36	19	35
	mean	23.2571	21.3571	24.1143		3.22443	2.77571	3.12814		27.2857	23.4286	26.4286
	sem	4.6467	4.30752	2.6631		0.456084	0.465412	0.480172		3.53698	3.07724	3.77874

## Sheet: Fig S1
Figure S1
	S1A	Cdk5 protein levels; fold
		siControl	siCdk5
	Cultive 1	1	0.481474
	Cultive 2	1	0.424938
	Cultive 3	1	0.448135
	mean	1	0.451516
	sem	0	0.016408
	S1B	Cdh1 protein levels; fold
		siControl	siCdh1
	Cultive 1	1	0.412642
	Cultive 2	1	0.471819
	Cultive 3	1	0.452748
	mean	1	0.445736
	sem	0	0.0174391
	S1C	Rock2 protein levels; fold			S1C	Rock1 protein levels; fold
		siControl	siRock2			siControl	siRock2
	Cultive 1	1	0.545718		Cultive 1	1	1.11408
	Cultive 2	1	0.510595		Cultive 2	1	0.94215
	Cultive 3	1	0.436902		Cultive 3	1	0.8938
	mean	1	0.497738		mean	1	0.983342
	sem	0	0.0320635		sem	0	0.0668402
	S1D	pCdh1/Cdh1 protein levels; fold
		0h	Aβ 4h	Aβ 8h	Aβ 4h +siCdk5	Aβ 4h +Rosc
	Cultive 1	1	2.4985	2.88574	1.39315	0.456004
	Cultive 2	1	2.19098	2.46637	1.41824	0.743762
	Cultive 3	1	1.82119	2.0279	1.17416	0.616402
	mean	1	2.17022	2.46001	1.32851	0.605389
	sem	0	0.195798	0.247658	0.0775186	0.0832509

## Sheet: Fig S2
Figure S2
	S2A	Apoptosis increase; AnnexinV+/7AAD- (%)
		Empty	Cdh1-A	Cdh1-D
		Aβ-C	Aβ-C	Aβ-C
	Cultive 1	14.57	6.3	15.2
	Cultive 2	16.75	6.7	14.5
	Cultive 3	14.51	8.2	14.8
	Cultive 4	15.29	9	15.1
	mean	15.28	7.55	14.9
	sem	0.521057	0.633114	0.158114
	S2B	Apoptosis increase; AnnexinV+/7AAD- (%)
		siControl	siCdh1	proTAME
		Aβ-C	Aβ-C	Aβ-C
	Cultive 1	14.6	15.8	16.6
	Cultive 2	15.3	17.3	16.5
	Cultive 3	14.9	19	15.9
	Cultive 4	14.3	16.2	13.4
	mean	14.775	17.075	15.6
	sem	0.2136	0.715746	0.749444
	S2C	Caspase-3 Activity increase; pmol AMC/h/µg protein
		siControl	siCdh1	proTAME
		Aβ-C	Aβ-C	Aβ-C
	Cultive 1	16.71	25.82	23.75
	Cultive 2	12.86	18.8	27.5
	Cultive 3	19.23	20.44	24.65
	Cultive 4	24.03	42.49	42.47
	mean	18.2075	26.8875	29.5925
	sem	2.34139	5.4126	4.36627
	S2D	Apoptosis; AnnexinV+/7AAD- (%)
		Control	Fasudil	SR3677
	Cultive 1	10.53	10.58	9.02
	Cultive 2	10.73	12.15	11.67
	Cultive 3	9.27	11.39	10.59
	mean	10.1767	11.3733	10.4267
	sem	0.456995	0.453297	0.769336
